# Supplementary material for: Myc-Related Mitochondrial Activity as a Novel Target for Multiple Myeloma
Source: PubMed Central journal article supplement (PMC8037116; doi:10.3390/cancers13071662), 2021-04-01

## Supplementary Materials: Myc-Related Mitochondrial Activity as a Novel Target for Multiple Myeloma

Alejandra Ortiz-Ruiz<sup>1-2†</sup>, Yanira Ruiz-Heredia<sup>1-2†</sup>, María Luz Morales<sup>1-2</sup>, Pedro Aguilar-Garrido<sup>1-2</sup>, Almudena Garcia-Ortiz<sup>1-2</sup>, Antonio Valeri<sup>1-2</sup>, Carmen Bárcena<sup>3</sup>, Rosa María García-Martin<sup>3</sup>, Vanesa Garrido<sup>1-2</sup>, Laura Moreno<sup>1-2</sup>, Alicia Gimenez<sup>1-2</sup>, Miguel Ángel Navarro-Aguadero<sup>1</sup>, María Velasco-Estevez<sup>1</sup>, Eva Lospitao<sup>4</sup>, María Teresa Cedena<sup>2</sup>, Santiago Barrio<sup>1-2</sup>, Joaquín Martínez-López<sup>1-2#</sup>, María Linares<sup>1-2#</sup> and Miguel Gallardo<sup>1-2\*</sup>

| Patient therapies                                    |                              | MGUS<br>(N=15) | SMM<br>(N=19) | NDMM<br>(N=27) | RRMM<br>(N=22) |
|------------------------------------------------------|------------------------------|----------------|---------------|----------------|----------------|
| <b>Therapy lines before sample collection (%)</b>    |                              |                |               |                |                |
|                                                      | RD                           | 0              | 5,3           | 3,85           | 18,2           |
|                                                      | VRD                          | 0              | 0             | 0              | 22,7           |
|                                                      | VMP                          | 0              | 0             | 0              | 4,5            |
|                                                      | VTD                          | 0              | 0             | 0              | 4,5            |
|                                                      | KRD                          | 0              | 0             | 0              | 0              |
|                                                      | KDD                          | 0              | 0             | 0              | 0              |
|                                                      | VBMCP                        | 0              | 0             | 0              | 9,1            |
|                                                      | Other therapies <sup>a</sup> | 0              | 0             | 3,85           | 41             |
|                                                      | No therapy                   | 100            | 94,7          | 92,3           | 0              |
| <b>Therapy lines following sample collection (%)</b> |                              |                |               |                |                |
|                                                      | RD                           | 0              | 5,3           | 14,8           | 18,5           |
|                                                      | VRD                          | 0              | 5,3           | 0              | 18,5           |
|                                                      | VMP                          | 0              | 15,7          | 18,5           | 11,1           |
|                                                      | VTD                          | 0              | 5,3           | 3,7            | 3,7            |
|                                                      | KRD                          | 0              | 5,3           | 0              | 0              |
|                                                      | KDD                          | 0              | 0             | 0              | 0              |
|                                                      | VBMCP                        | 0              | 0             | 0              | 14,8           |
|                                                      | Other therapies <sup>a</sup> | 0              | 5,3           | 37,1           | 14,9           |
|                                                      | No therapy                   | 100            | 57,8          | 25,9           | 18,5           |

**Table S1.** Patient treatment regimens. Patient therapies and frequency of treatment according to each stage of the disease (N=123).

Abbreviations: KDD, carfilzomib daratumumab dexamethasone; KRD, carfilzomib lenalidomide dexamethasone; RD, lenalidomide dexamethasone; VBMCP, vincristine doxorubicin melphalan cyclophosphamide prednisone; VMP, bortezomib melphalan

prednisone; VRD, bortezomib lenalidomide dexamethasone; VTD, bortezomib thalidomide dexamethasone

<sup>a</sup>Other therapies (22): lenalidomide dexamethasone and clarithromycin; melphalan + prednisone; isatuximab + velcade + clarithromycin + dexamethasone; velcade + dexamethasone; dexamethasone + cyclophosphamide; darzalex + velcade + melphalan + prednisone; velcade + cyclophosphamide + prednisone; clinical trial CC-92480; vincristine + carmustine + doxorubicine + dexamethasone; velcade + cyclophosphamide + dexamethasone; isatuximab; vincristine + carmustine + melphalan; cyclophosphamide + prednisone; clinical trial NKaes; pomalidomide + dexamethasone; bendamoustine + velcade + dexamethasone; darzalex + velcade + dexamethasone; clinical trial CASTOR; carfilzomib + dexamethasone; carfilzomib + cyclophosphamide + dexamethasone; elutuzumab + thalidomide + dexamethasone; clinical trial POMDEFIL; aplidin; clinical trial MK3475.

| <b>Antibodies</b>                       | <b>MW kDa</b>      | <b>Used dilution</b> | <b>Source</b>  |
|-----------------------------------------|--------------------|----------------------|----------------|
| OXPPOS                                  | 54, 48, 29, 22, 18 | 1:1000               | Abcam          |
| c-Myc                                   | 60                 | 1:1000               | Abcam          |
| B-actin                                 | 45                 | 1:1000               | Cell Signaling |
| Goat polyclonal antibody<br>anti-mouse  | -                  | 1:1000               | Dako           |
| Goat polyclonal antibody<br>anti-rabbit | -                  | 1:1000               | Dako           |

**Table S2.** Antibodies used for western blotting.

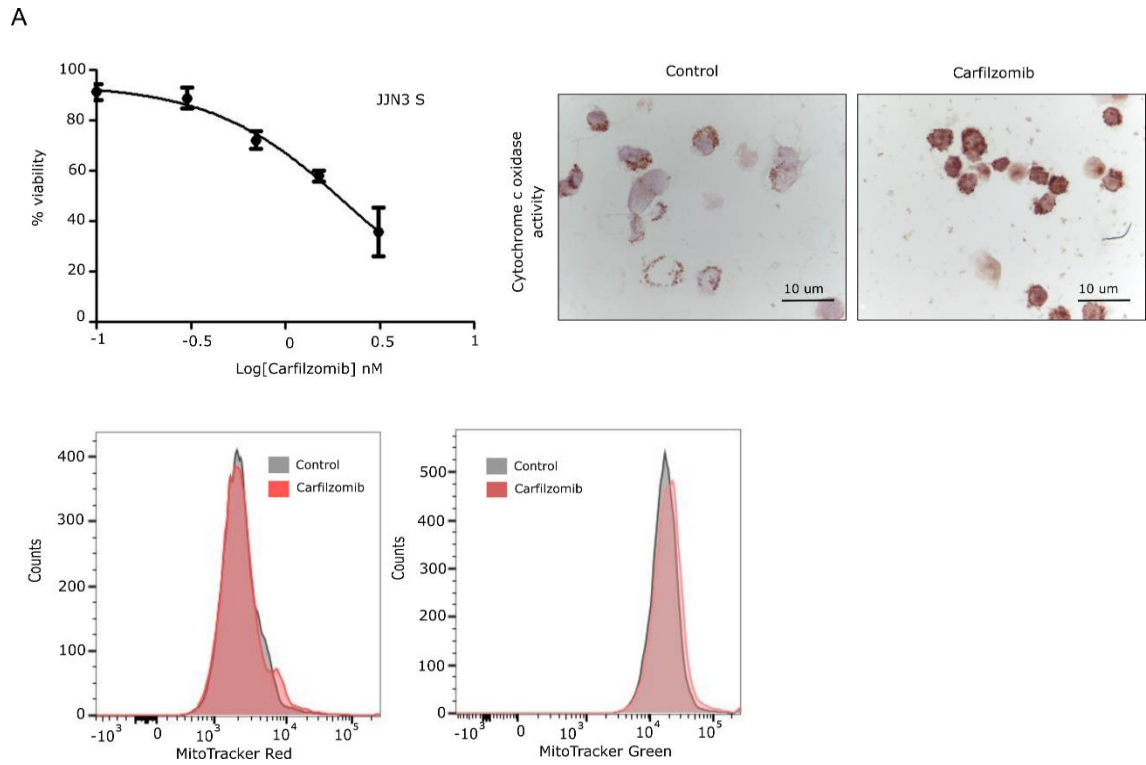

**Figure S1.** Contribution of carfilzomib treatment in mitochondrial activity features. **A** Study of carfilzomib cytotoxic effects in JJN3 S cells. Analysis of mitochondrial activity by histoenzymatic analysis of COX activity in JJN3 S cells treated with 0.1% DMSO (control) or 1.5 nM carfilzomib; and flow cytometry analysis of MitoTracker Red (left, mitochondrial membrane potential) and green (right, mitochondrial mass) in JJN3 S cells with 0.1% DMSO (control, grey) or 1.5 nM carfilzomib (red) (n=3).

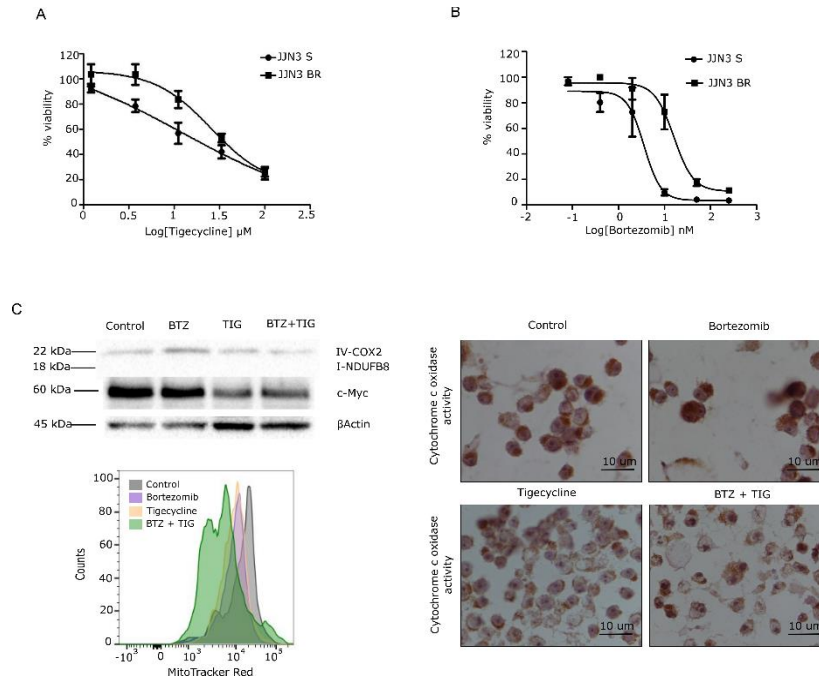

**Figure S2.** Effect of tigecycline and the combination with bortezomib on JLN3 BR cells. **A** Comparison of tigecycline activity in JLN3 S and JLN3 BR cells. **B** Comparison of bortezomib activity in JLN3 S and JLN3 BR cells. **C** Molecular validation of mitochondrial inhibition of JLN3 BR cells treated with 3.7  $\mu$ M tigecycline, 2 nM bortezomib and their combination (n=3): by WB of respiratory chain complexes I and IV and c-Myc; by HE-COX; and by Multiparametric Flow Cytometry (MFC) analysis of MitoTracker Red (mitochondrial membrane potential). All of the drug treatments were for 48 h; n= 3.

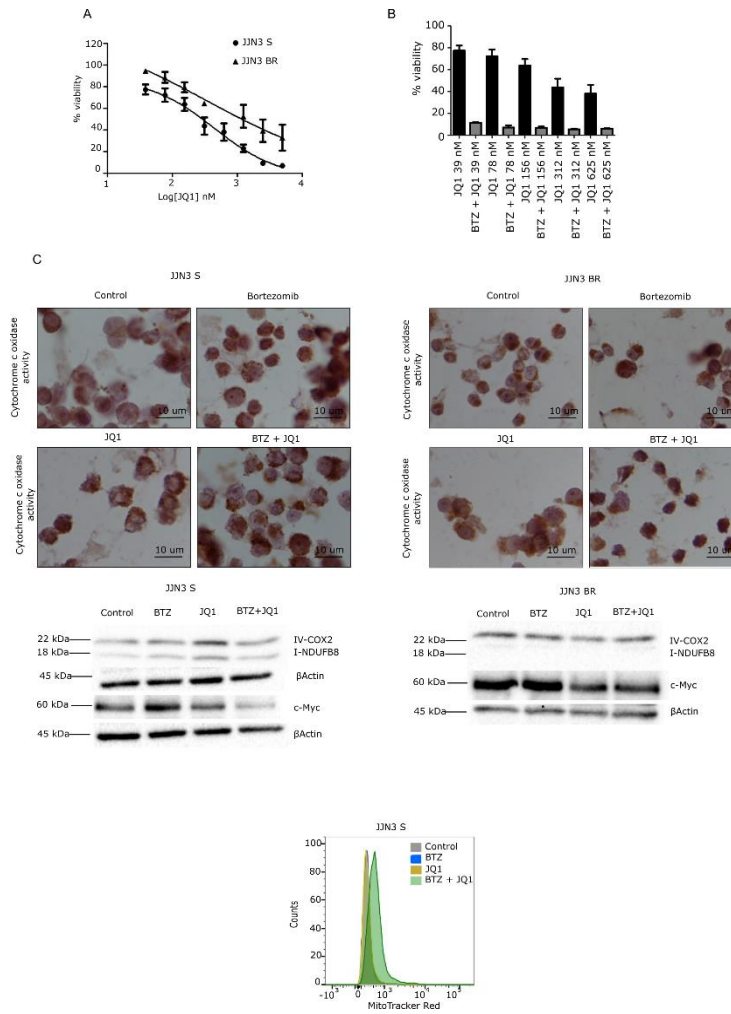

Figure 3C

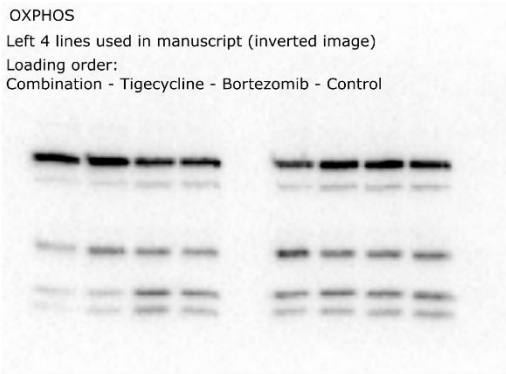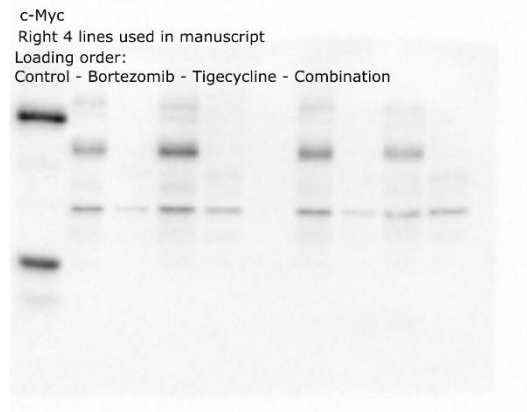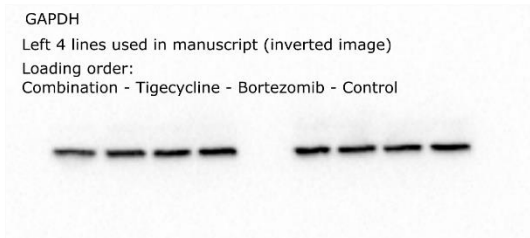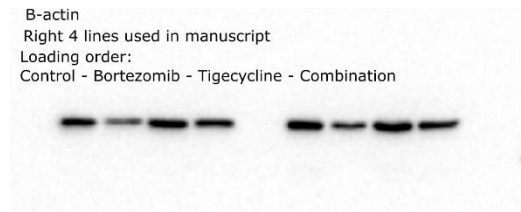

Figure S2B

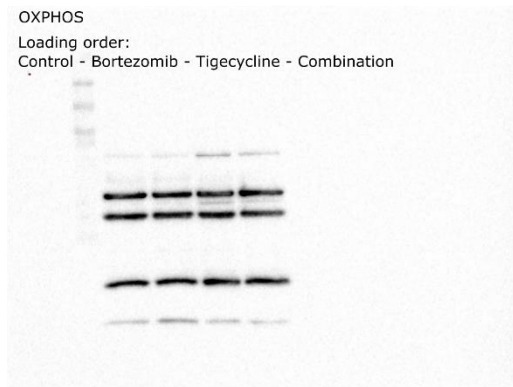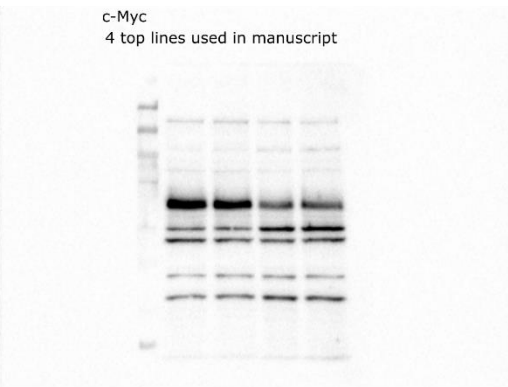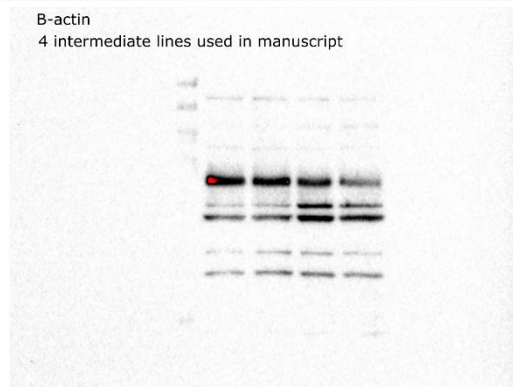

Figure S3C

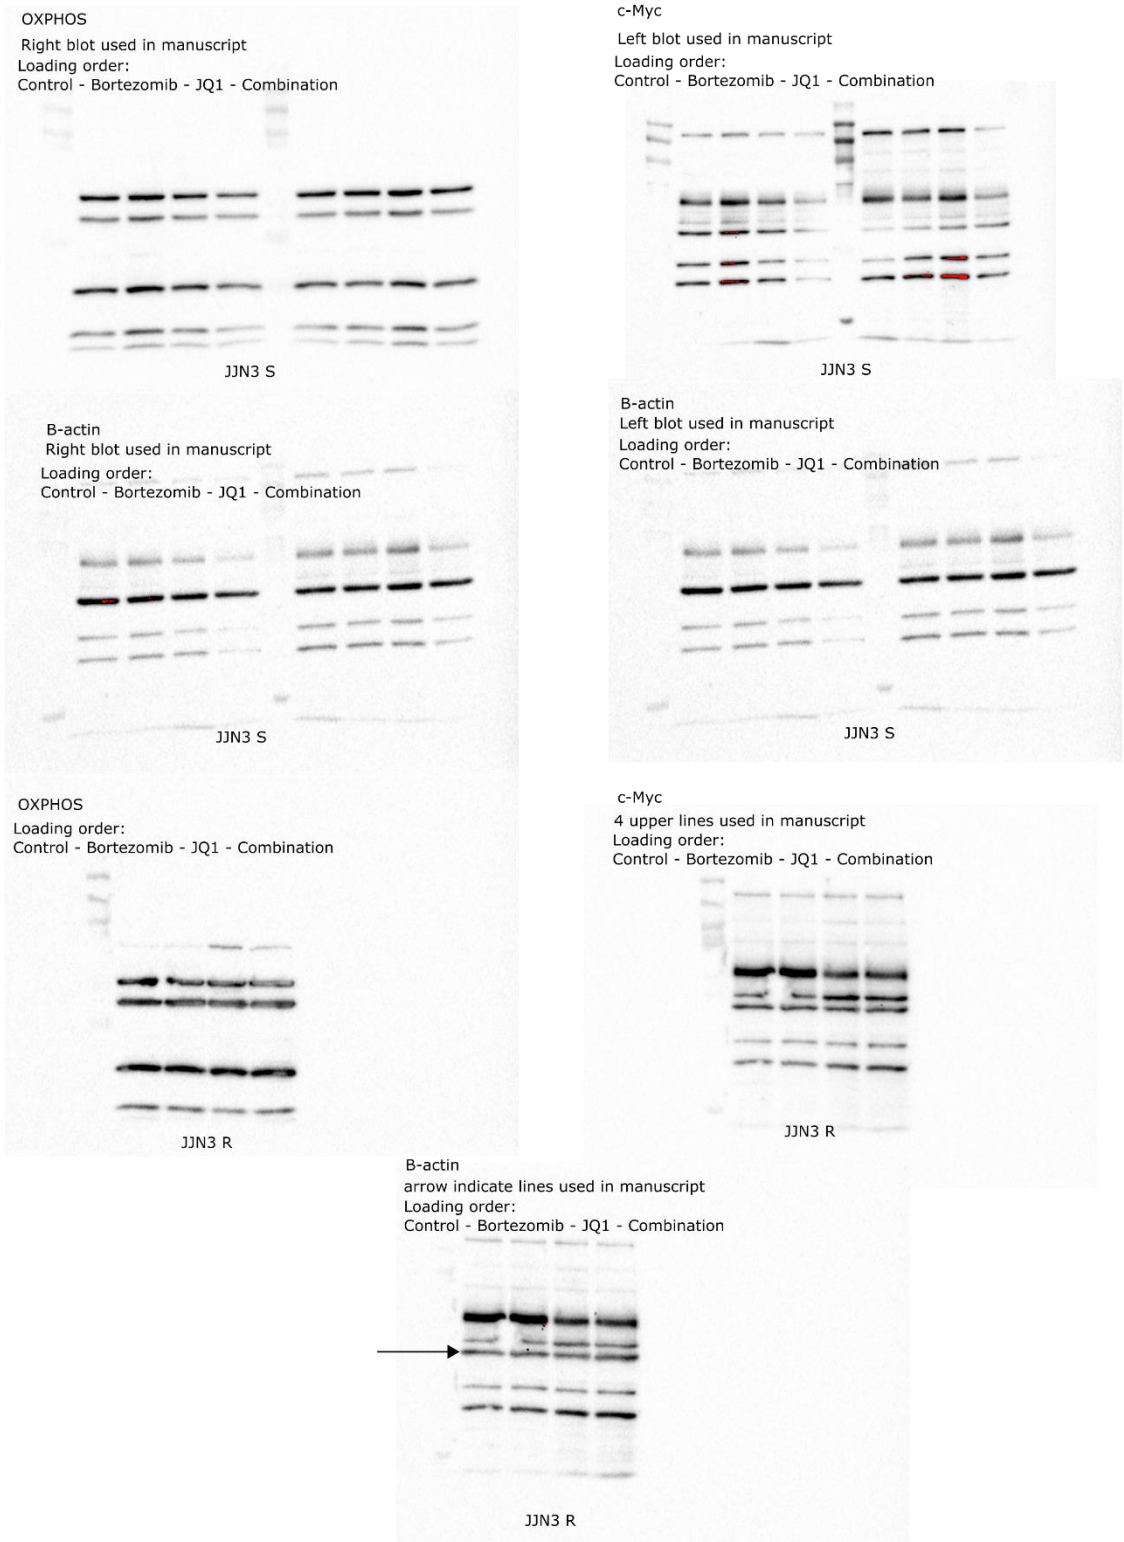

Figure S4: uncropped western blot.

A

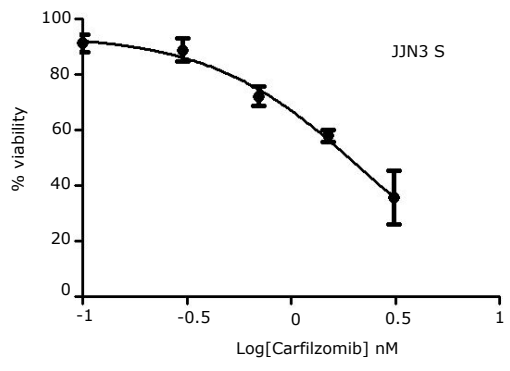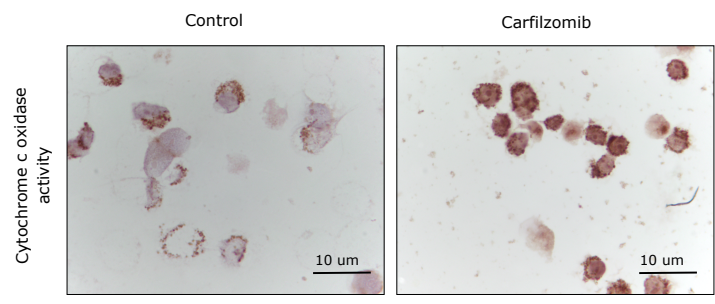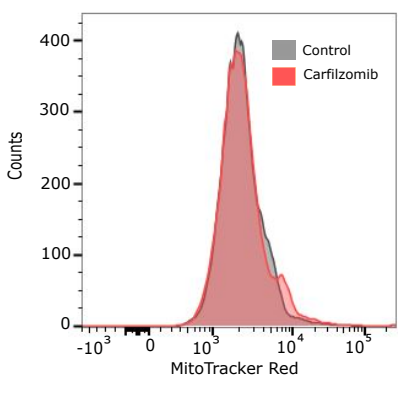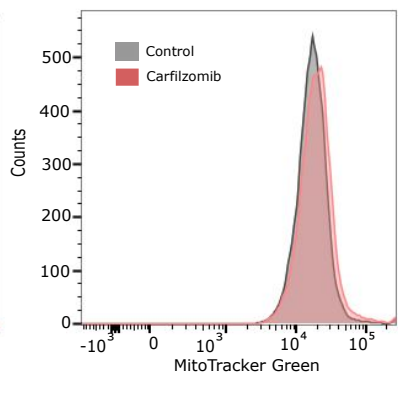



A

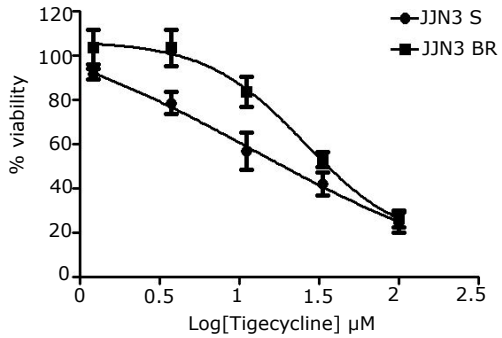

B

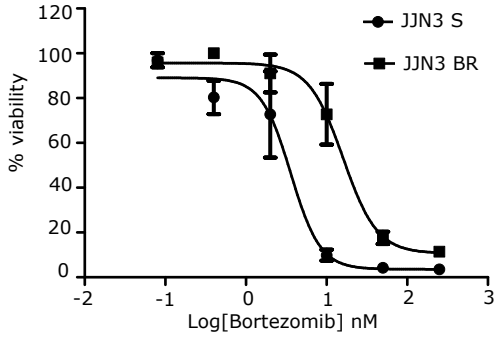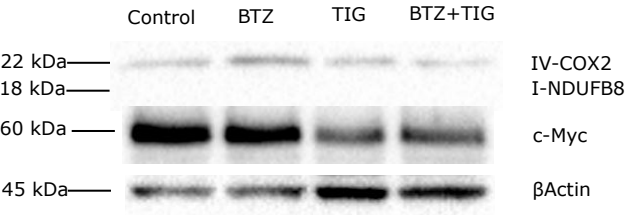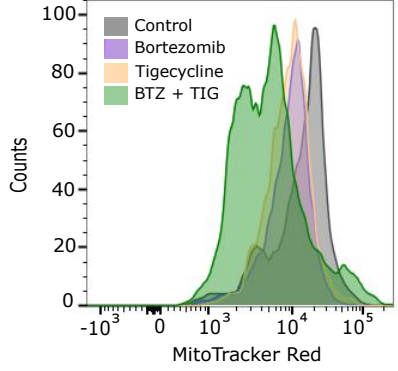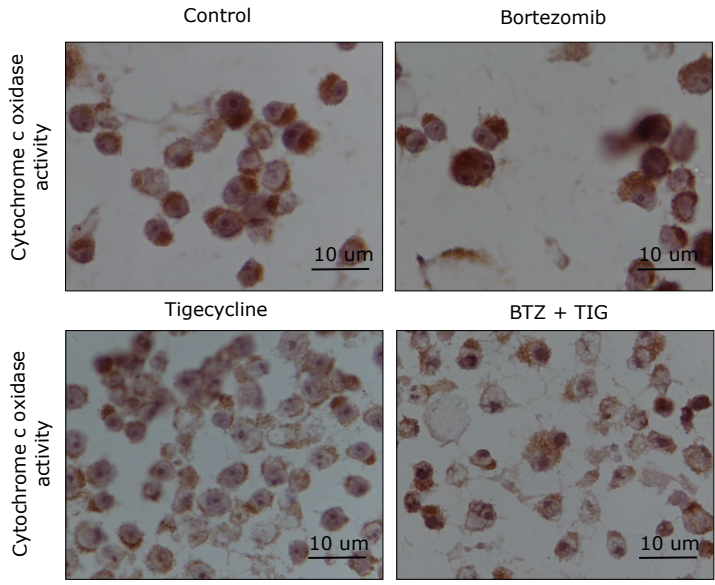

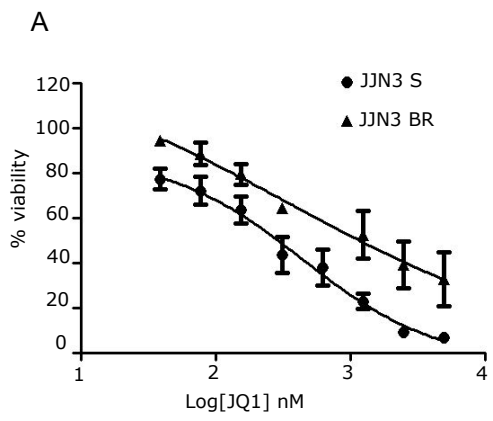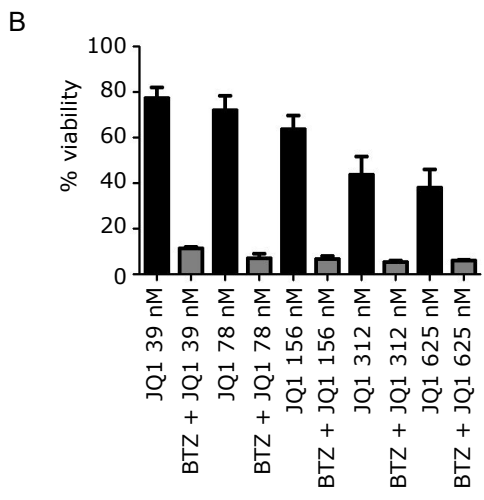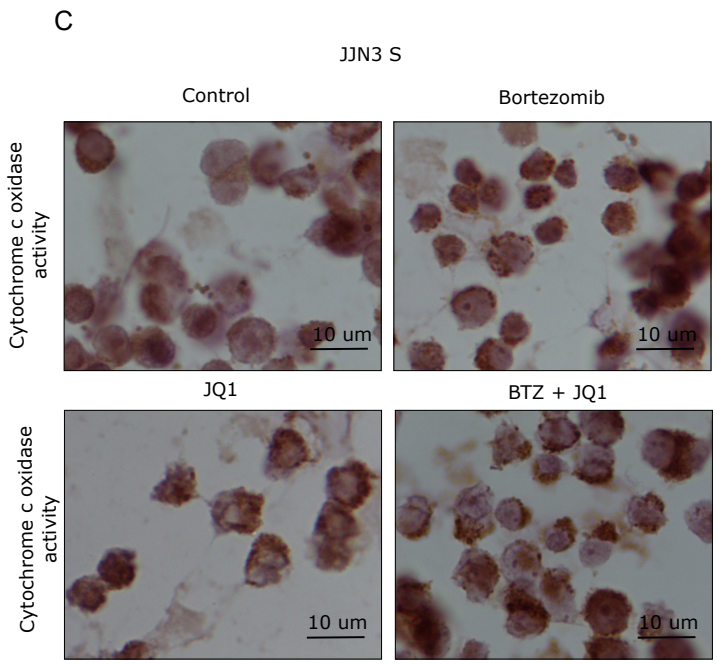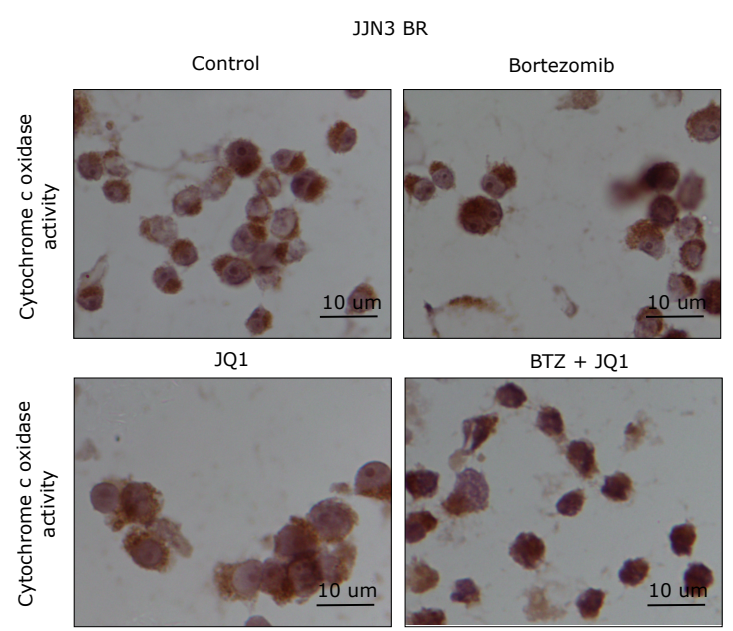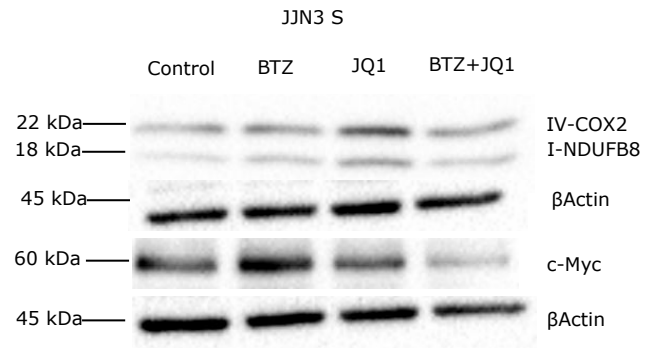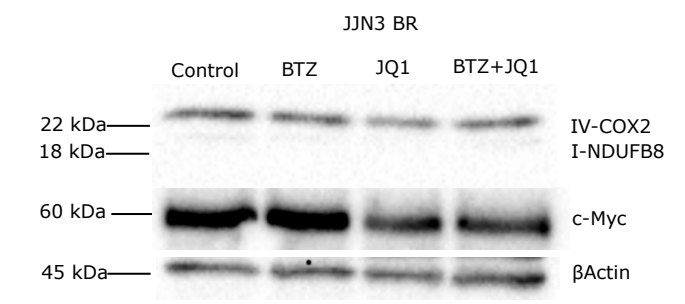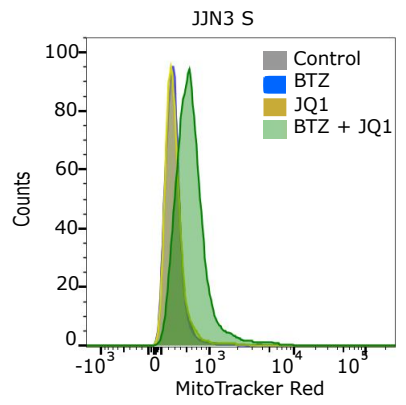

Figure 3C

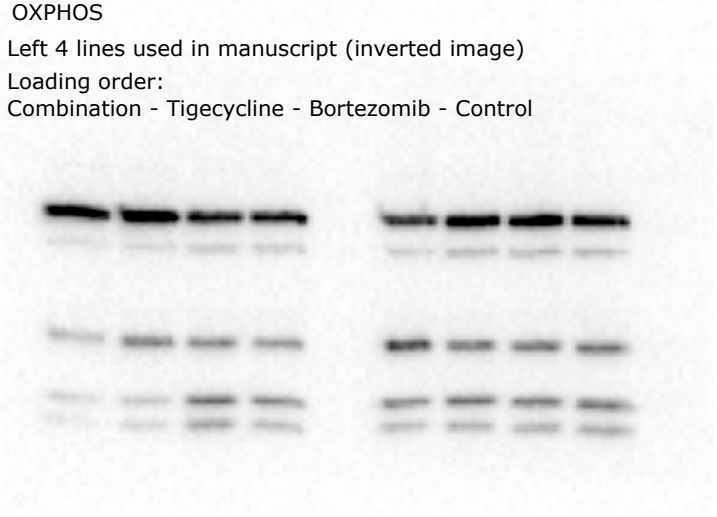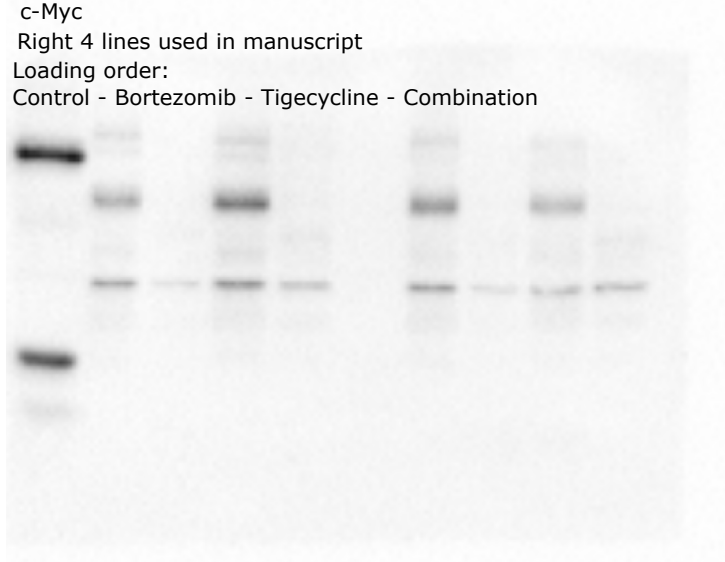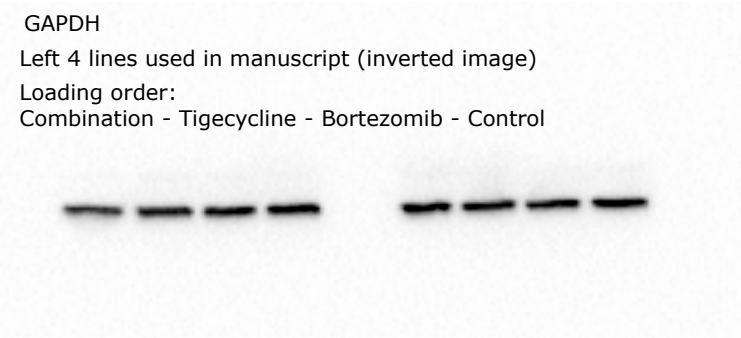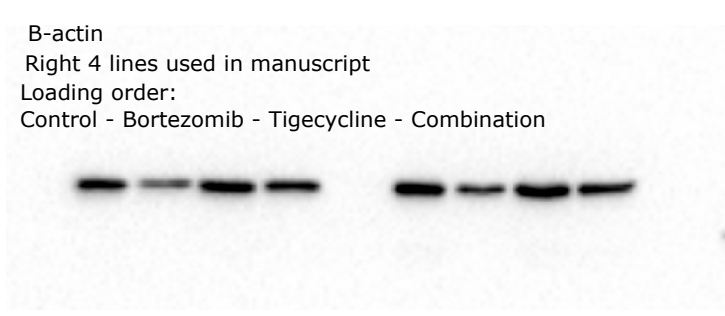

Figure S2B

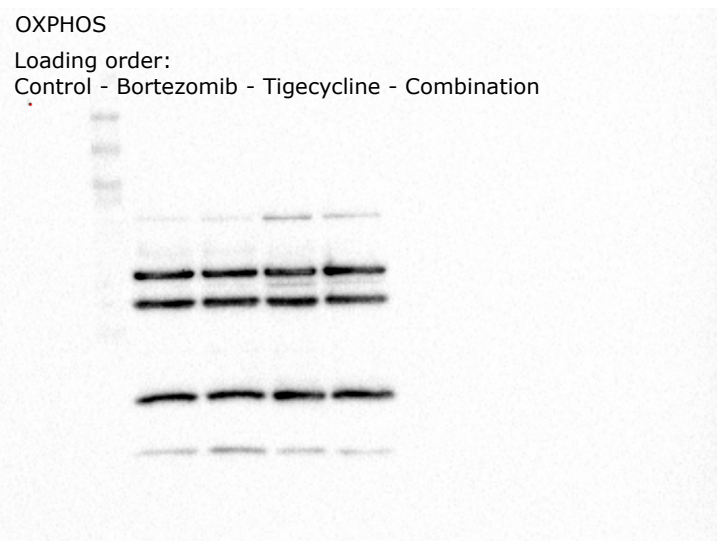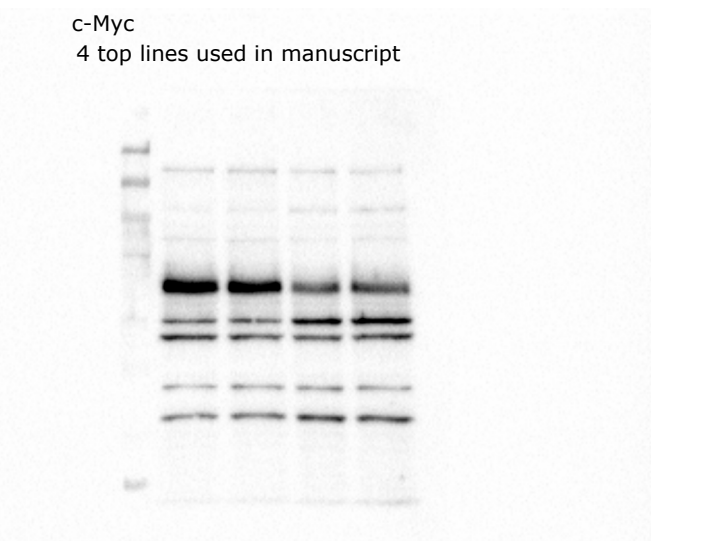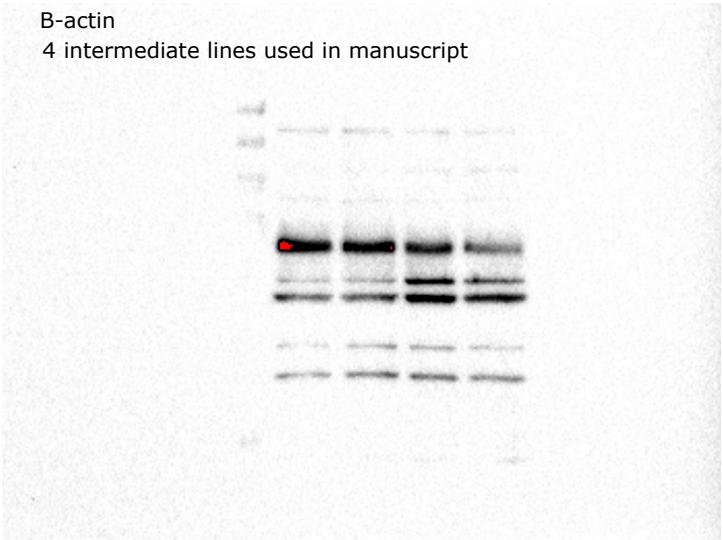

Figure S3C

OXPHOS

Right blot used in manuscript

Loading order:

Control - Bortezomib - JQ1 - Combination

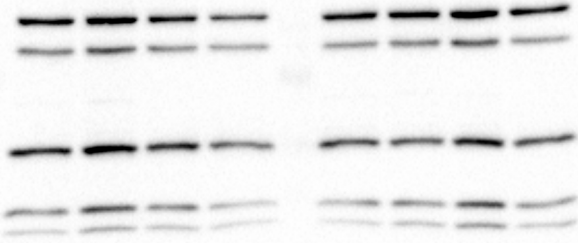

JJN3 S

c-Myc

Left blot used in manuscript

Loading order:

Control - Bortezomib - JQ1 - Combination

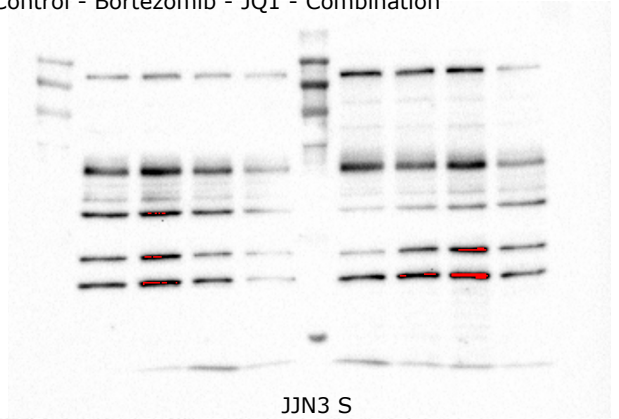

JJN3 S

B-actin

Right blot used in manuscript

Loading order:

Control - Bortezomib - JQ1 - Combination

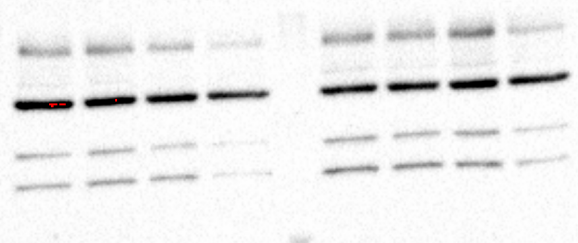

JJN3 S

B-actin

Left blot used in manuscript

Loading order:

Control - Bortezomib - JQ1 - Combination

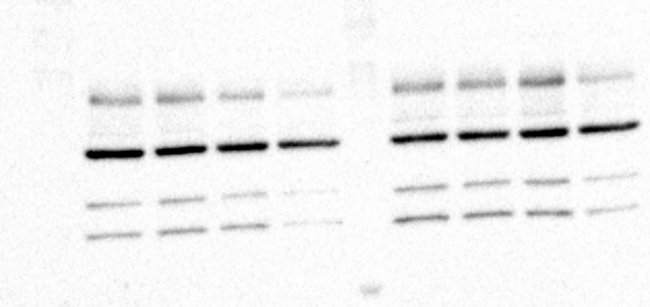

JJN3 S

OXPHOS

Loading order:

Control - Bortezomib - JQ1 - Combination

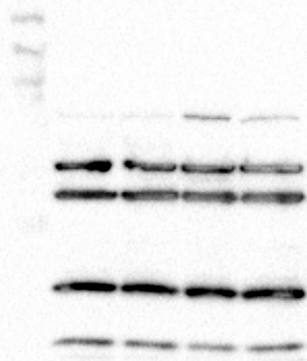

JJN3 R

c-Myc

4 upper lines used in manuscript

Loading order:

Control - Bortezomib - JQ1 - Combination

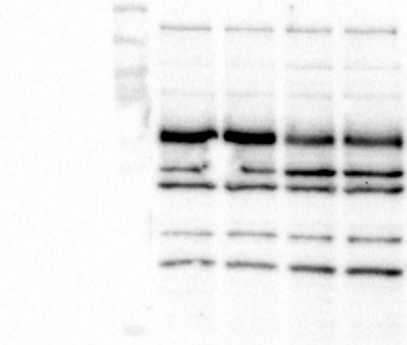

JJN3 R

B-actin

arrow indicate lines used in manuscript

Loading order:

Control - Bortezomib - JQ1 - Combination

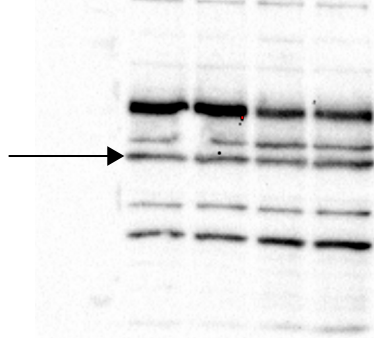

JJN3 R

Figure S4A

OXPHOS

Right blot used in manuscript, lanes 7 and 8

Loading order:

Control - Daratumumab

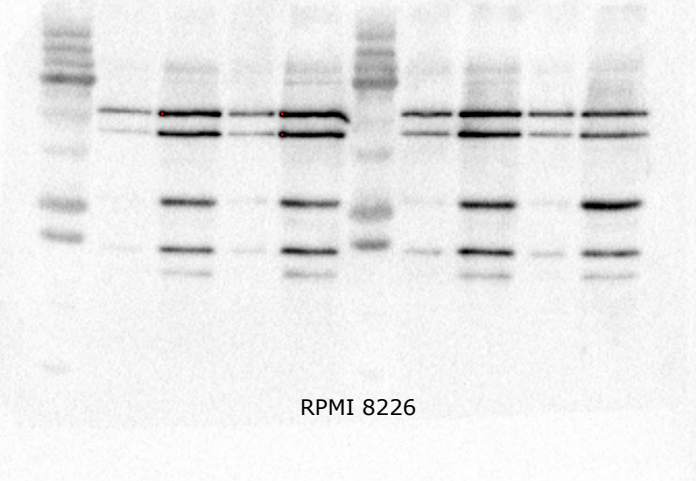

c-Myc

Right blot used in manuscript, lanes 7 and 8

Loading order:

Control - Daratumumab

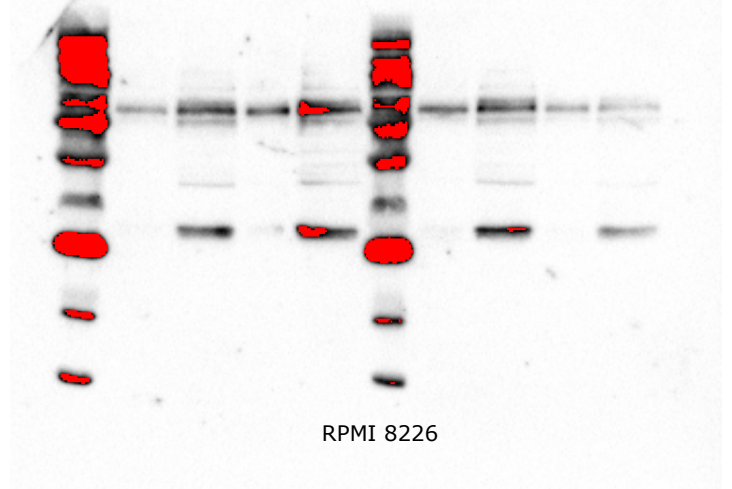

B-actin

Right blot used in manuscript, lanes 7 and 8

Loading order:

Control - Daratumumab

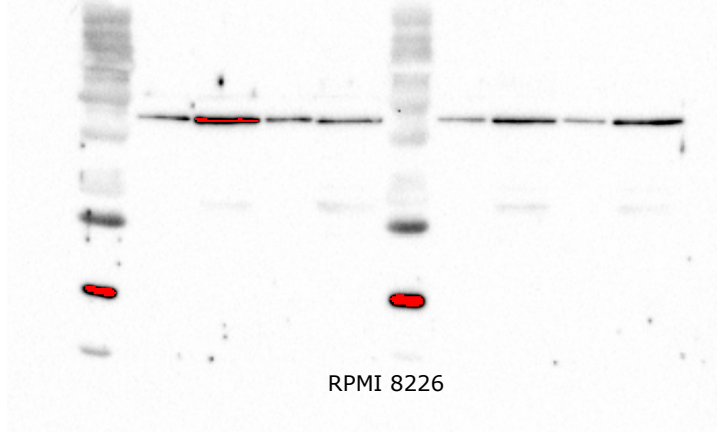

Supplement: cancers-13-01662-s001.pdf [file cancers-13-01662-s001.pdf]
